## P1250

**Validation of quantitative flow reserve and residual quantitative flow reserve to predict fractional flow reserve post stenting from the DOCTORS study population**

B.G. Guillon<sup>1</sup>, V.R. Rubimbura<sup>2</sup>, S.F. Fournier<sup>2</sup>, N.A. Amabile<sup>3</sup>, C.C.P. Chi Pan<sup>2</sup>, N.C. Combaret<sup>4</sup>, E.E. Eeckhout<sup>2</sup>, J.S. Silvain<sup>5</sup>, W. Wijns<sup>6</sup>, F. Schiele<sup>1</sup>, O. Muller<sup>2</sup>, N. Meneveau<sup>1</sup>, J. Adjedj<sup>2</sup>

<sup>1</sup>Regional University Hospital Jean Minjoz, Besancon, France; <sup>2</sup>University Hospital Centre Vaudois (CHUV), Lausanne, Switzerland; <sup>3</sup>Institut Mutualiste Montsouris, Paris, France; <sup>4</sup>University Hospital Gabriel Montpied, Clermont-Ferrand, France; <sup>5</sup>Hospital Pitie-Salpetriere, Paris, France; <sup>6</sup>National University of Ireland, Galway, Ireland

**Background:** Quantitative flow reserve (QFR) is a computation of fractional flow reserve (FFR) based on angiography without use of a pressure wire. The ability to predict post-PCI FFR using residual QFR after virtual stenting (pre-PCI), and using QFR (post-PCI) remains unknown. We sought to evaluate the correlation and diagnosis accuracy of residual QFR and post-PCI QFR to predict post-PCI FFR.

**Methods:** From the DOCTORS (Does Optical Coherence Tomography Optimize Results of Stenting) study population, we blindly analyzed the following from angiography, and compared them to post-PCI FFR: pre-PCI residual contrast QFR (cQFR) and fixed QFR (fQFR), and post-PCI cQFR and fQFR.

**Results:** 93 post-PCI QFR measurements and 84 residual QFR measurements were compared to post-PCI FFR measurements in 93 patients. Compared to the post-PCI FFR mean value of  $0.92 \pm 0.05$ , mean values of

residual cQFR, residual fQFR, post-PCI cQFR and post-PCI fQFR were, respectively:  $0.94 \pm 0.05$ ,  $0.93 \pm 0.05$ ,  $0.93 \pm 0.06$  and  $0.93 \pm 0.05$  (p values  $> 0.05$  for all pairs except for residual cQFR versus FFR ( $p=0.01$ )). Pearson correlation coefficients of residual cQFR, residual fQFR, post-PCI cQFR and post-PCI fQFR compared with post-PCI FFR were, respectively: 0.62, (95% CI: 0.46–0.73); 0.61, (95% CI: 0.45–0.73); 0.75, (95% CI: 0.64–0.83) and 0.73, (95% CI: 0.62–0.81). Area under the curves for these indices with a post-PCI FFR cutoff value of 0.90 were, respectively: 0.79, 0.78, 0.85 and 0.84.

**Conclusions:** cQFR and fQFR correlated well and had similar diagnostic performance. Pre-PCI QFR analysis with virtual PCI, and post-PCI QFR analysis, correlated well with post-PCI FFR, and had similar diagnostic accuracy. Further studies are needed to prospectively validate a QFR-guided PCI strategy.

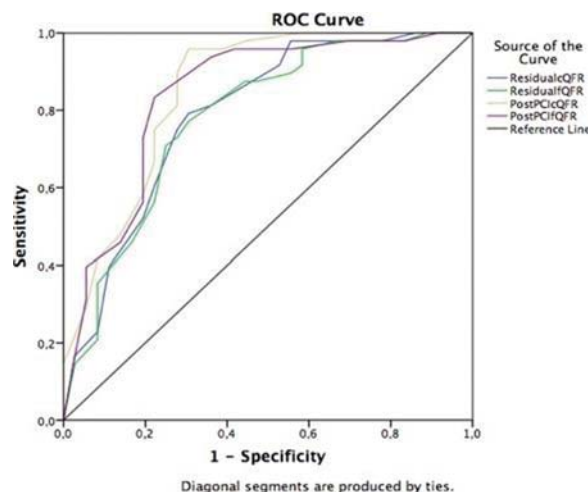

Source: http://academic.oup.com/eurheartj/article-pdf/40/Supplement_1/ehz748.0208/30204962/ehz748.0208.pdf
